# *Patient's Satisfaction with Eye Care Services from tertiary Eye hospital in Nepal*

Ranjan Shah<sup>1</sup>, Sailesh Kumar Mishra<sup>2</sup>, Prakriti Sharma<sup>3</sup>

1. Nepal Netra Jyoti Sangh, Kathmandu (NNJS), Nepal

2. Nepal Netra Jyoti Sangh, Kathmandu (NNJS), Nepal

3. Nobel College, Sinamangal

Corresponding Authors

Ranjan Shah

Program Manager

[ranjan\\_shah@nnjs.org.np](mailto:ranjan_shah@nnjs.org.np)

## **Abstract**

### **Purpose**

This study was conducted to assess the level of patient satisfaction with the eye care services received from different tertiary eye hospitals, running under Nepal Netra Jyoti (NNJS) Sangh, of Madhesh Province, Nepal over a 3-month period (October- December) 2017.

### **Methods**

A Cross-sectional based study with client exit interviews were done, using pretested Likert scale tool in sample of 1190 (P=0.5, and 95% CI) consenting patients after receiving the ophthalmic

26 care enrolled in the mentioned tertiary eye hospitals of Madhesh Province. Data on Behavior of  
27 the service provider, Services and facilities provided by the hospital was analyzed with the level  
28 of patient's satisfaction. A Pearson's chi-square test was used to examine the relationship between  
29 overall satisfaction and the dependent variables.

## 30 **Results**

31 Only 3.8 % of patients reported visiting the hospital more than four times. The main reasons for  
32 choosing their respective hospital was the 'quality of services' delivered through modern  
33 equipment at affordable costs (53 %) followed by easy access to hospital (39%). The average  
34 waiting time was 58 min, with a range of 5-240 min. Level of education ( $P<0.05$ ), Socioeconomic  
35 status ( $P<0.05$ ), Waiting time ( $P<0.05$ ), Hospital operating hours ( $P<0.05$ ), Cleanliness ( $P<0.05$ )  
36 and Cost of Service ( $P<0.05$ ) were significantly associated with the overall satisfaction with the  
37 services. Behavior of the service providers did not play a statistically significant role in overall  
38 satisfaction.

## 39 **Conclusion**

40 Patient satisfaction is a highly desirable outcome of clinical care and may even be an element of  
41 health status itself. Our data showed that a significant proportion (95%) of patients were satisfied,  
42 or highly satisfied overall (across all parametric measures), and that personal experience, beliefs  
43 and background may play a confounding factor in satisfaction. As a result, it can be safely  
44 concluded that perceived quality and performance in the hospitals are exceptional.

## 45 **Key words**

46 Patient's satisfaction, Eye Care Service, Tertiary eye hospital, Madhesh Province.

## 47 **Introduction**

48 Patient satisfaction refers to how closely a patient's expectations of the optimum level of care  
49 match up with how they feel they actually received that level of care<sup>1</sup>. In recent years, patient  
50 happiness has gained in prominence. Many healthcare professionals are starting to recognize its  
51 use in evaluating hospital performance, quality, and patient outcomes. These fundamental factors  
52 are worldwide problems that several nations at all stages of. As a result, the health care sector is  
53 rapidly changing to meet the rising demands and needs of its patient population<sup>2,3</sup>. Standards of  
54 professional practice and other provider/hospital-oriented indicators, such as technology, have  
55 historically been used to measure the quality of healthcare. However, there is less of a focus on  
56 objective statistics and more on subjective empirical evidence as a result of this renewed interest  
57 in patient-oriented indicators. Moreover, health care recipients in developing countries are more  
58 sensitive to perceptions of the quality of healthcare service<sup>4</sup>.

59 Out of 77 districts of Nepal, 60 of them provides eye care services under NNJS where the users  
60 exceed 3 million every year. The number of eye care professionals has expanded to 420  
61 ophthalmologists, over 2000 ophthalmic assistants, and more than 1300 optometrists, with a  
62 cataract surgical rate of 4500. As per the Rapid Assessment of avoidable blindness survey in 2021,  
63 the National CSC<sub><6/60</sub> for the total population 50 years and above is 82.7% (95% CI 80.8 - 84.4)  
64 which is slightly less than the target of at least 85% recommended by the International Agency for  
65 the Prevention of Blindness (IAPB).

66 Patient satisfaction surveys examine many and novel facets of healthcare, offering a wonderful  
67 chance to involve clients or patients in the process of enhancing the standard of services and,  
68 consequently, the quality of patients' lives<sup>5</sup>. Previous studies suggest improvement in

69 communication skills, technical help as well as an alternative option for funding to the patient  
70 without health insurance for patient's satisfaction<sup>6</sup>.

71 Despite the prevalence of patient satisfaction studies in ophthalmology care around the world,  
72 relatively few studies have been undertaken in Nepal. In contrast, many patient satisfaction studies  
73 were conducted in Nepal to evaluate health services in other fields of medicine but in regards to  
74 eye services very few studies have been conducted. Thus this study aims to analyse the level of  
75 patient satisfaction with eye care services received from tertiary hospital of Madhesh Province

## 76 **Materials and methods**

### 77 **Study design and settings**

78 A cross-sectional descriptive study conducted in three different eye hospitals of Madhesh Province  
79 which are running under NNJS. The hospitals were selected from 3 different districts (Rautahat,  
80 Bara and Siraha). They were Gaur eye hospital, R. M. Kedia eye hospital, Sagarmatha Choudhary  
81 eye Hospital respectively. The patient getting Ophthalmic care services from OPD and IPD (Out-  
82 patient and in-patient department) were enrolled in this study.

### 83 **Ethics and consent**

84 Ethical approval for the study was provided by ethical review board committee of Nepal health  
85 Research Council (NHRC). Permission was granted by the NNJS central office which run these  
86 eye hospitals prior to the study. Participant were provided a detailed explanation of the purpose  
87 and scope along with formal and written consent before including them in this study. Before the  
88 data collection, written consent was taken from each participants. All the participants were  
89 informed about their right to withdraw from the research if they are not comfortable providing the

90 information. In case of under 18 years of age participants, their parents and guardians were  
91 interviewed and identity of the participation was kept confidential.

## 92 **Study procedure**

93 The study was carried out between October and December 2017. The previous studies on patient  
94 satisfaction with eye care service and using appropriate statistical formula for estimating sample  
95 size [ $n=Z pq/d$ ] with 5% non-responsive rate, a sample of 403 per hospital (1209 from the three  
96 hospital) was calculated to detect level of satisfaction among the study participant. Structured  
97 questionnaire was used with 5 point Likert scale ranging from Highly dissatisfied to Highly  
98 satisfied. Open and close ended questionnaire was used developed in English and later translated  
99 in Nepali for convenience. A pilot test was conducted in 50 patients in Kritipur Hospital for validity  
100 which was not included in this study. The questionnaire consists of 34 items which measures socio-  
101 demographic variable, several core dimension of patient satisfaction, behaviour of service  
102 provider, Services and facilities provided in OPD and IPD department.

## 103 **Data analysis**

104 The data was cleaned, edited and coded in the same day of data collection. Data entry and analysis  
105 was carried out in SPSS (Statistical Package for the Social Sciences). Descriptive Analysis was  
106 done to check distribution of data, detecting outliers and measure association among variables.  
107 Chi-square test was done in Bivariate analysis to identify association between dependent and  
108 independent variables.

## 109 **Results and discussion**

### 110 **Descriptive analysis**

111 Among 1190 respondents, the average male and female population in selected tertiary hospitals  
112 were 66% and 33% respectively. The mean age was 40 years and 79% of patients were from out-  
113 patient-department and 21% from the inpatient department. Among the three hospitals, Gaur  
114 Hospital had the highest proportion of neutrality or dissatisfaction in compared to other hospitals.  
115 Table 1 shows the overall satisfaction in aggregate of 3 different hospitals', demographic  
116 characteristics of the patient included in the study. In regards to the educational qualification,  
117 majority of the population were illiterate or could only read and write whereas for survival length  
118 based on respondent's main source of income 67.06% reported less than 6 months. Very less  
119 respondents had visited 4 times or more for eye check up in the hospital and their major reason for  
120 hospital visit was for quality of service by modern equipment at low price.

121 In regards to the behaviour of service provider and service and facility related variable, majority  
122 of respondents expressed satisfaction with the behaviour of the doctor's/examiners, registration  
123 personnel and spectacle dispensers. Moreover, at least 80% of patients reported being SFD or  
124 HSF (satisfied or highly satisfied), thus service- and facility-related characteristics were also  
125 highly appreciated. In all three selected hospitals, high number of patients were satisfied with the  
126 services provided by the hospital. Table 2 and table 3 shows the level of satisfaction among the  
127 three hospital.

### 128 **Bivariate Analysis**

129 Majority of the respondents in selected hospital responded the service provided are fair, satisfied  
130 or highly satisfied. Pearson's Chi-Square test was done to determine the significance level of

131 satisfaction among the respondents. The study was significantly associated with the overall  
132 satisfaction ( $p=0.004$ ). Another factor that was significantly associated with overall satisfaction  
133 was socioeconomic level ( $p=.000$ ). In comparison to patients who could survive longer than one  
134 year, those who reported having less than six months left on their primary source of income were  
135 14% more likely to feel FR, SFD, or HSFD with the institution as a whole. In regards to behaviour  
136 of the service provider, the patient's satisfaction was statistically insignificant but factors related  
137 to the service itself and the physical infrastructure were statistically significant. Waiting time  
138 ( $p=0.005$ ), hospital working hours ( $p=0.001$ ), impression of treatment plan ( $p=0.012$ ), cleanliness  
139 ( $p=.029$ ), and cost of service ( $p=.000$ ) were all substantially correlated with level of satisfaction.

## 140 **Discussion**

141 According to the study's findings, patient satisfaction was generally quite high. Across all  
142 parametric metrics, covering the three institutions, 95% of patients said they were "SFD" or  
143 "HSFD" with their overall experience. The consequence is that patients believe the perceived  
144 quality to be excellent.

145 When decisions are made concerning service adjustments and improvements, patient satisfaction  
146 is vital, hence enhancing patient's satisfaction may help to increase the chances that they can  
147 suggest a certain provider to friends and family who are looking for a qualified physician. For the  
148 most part, individuals trust their friends and family for information, especially when choosing a  
149 healthcare practitioner<sup>7,8</sup>. Roughly 99% of respondents in our study stated they would refer the  
150 hospital in question to others. Although patient happiness and referrals are connected metrics,  
151 some researchers have discovered that a hospital with high satisfaction does not always translate  
152 into high referrals, and the opposite is also true. On the other hand, only one survey participant

153 said they would not recommend the facility to others, even though 5% of respondents (n=59) said  
154 they were generally "DSFD" or "HDSFD." This indicates that evaluations of patient satisfaction  
155 and recommendation has to be conducted independently<sup>9</sup>. The majority of this report's focus was  
156 on patient satisfaction with regard to quality and the variables influencing it.

157 The Kano model, developed by researchers in University of Tokyo is useful to analyse patient's  
158 satisfaction, quality visually and allows for studying different levels of patients expectation<sup>10</sup>. The  
159 model demonstrates three relationships between satisfaction and quality (expected, performer and  
160 delighter). Patients will have a foundational set of unspoken expectations regarding their care that  
161 are frequently taken for granted (red line). Since they are routine, these expectations are constant.  
162 The majority of patients don't even perceive them as comparable quality variables, thus their  
163 absence will surprise them<sup>11</sup>. Although the patient may not be aware of these expectations, if they  
164 are not fulfilled, the patient is more likely to experience considerable dissatisfaction. This is  
165 demonstrated by the sharp drop in satisfaction when care investment becomes less favourable  
166 (toward the left on the x-axis). However, even delivering services of this fundamental calibre may  
167 not be sufficient to satisfy patients. Thus, the line never crosses the 0 mark, often known as "neutral  
168 satisfaction." The implication is that more criteria are necessary to affect satisfaction. 96% of  
169 respondents in our sample were SFD or HSFDF with the mannerisms of the medical personnel, the  
170 hospital staff, as well as the treatments they received. Based on these figures, it is safe to say that  
171 our survey population's fundamental needs are being satisfied.

172 The model demonstrates that patients will be unsatisfied if certain quality expectations are not met  
173 and that satisfaction rises linearly as more of these expectations are met. Patients make decisions  
174 based on comparisons of these expectations to identify distinctions between rivals. In this study,  
175 94% of the participants had access to hospitals during operating hours and were SFD or HSFDF. In



176 terms of cleanliness, 87% were SFD/HSFD, and 96% claimed the same for healthcare costs. The  
177 delighter quality curve, which only exists in the satisfaction zone, shows unexpectedly high-quality  
178 products that patients didn't know they wanted and that, when they are, provide a pleasant surprise.  
179 In this encounter, expectations are surpassed, frequently as a result of innovation that might  
180 enhance patient expectations and give a substantial competitive advantage. Hospital data indicate  
181 that this is mostly accomplished through the patient's perception of personalized, personalised  
182 service, supplied by compassionate and concerned doctors <sup>12</sup>.

183 The focus of NNJS and the institutions in its network has always been patient-centred care. As an  
184 illustration, patient counselling is a service provided to particular patients who may need more  
185 help and knowledge. With 85% of patients (who used the service) reporting being SFD/HSFD, it  
186 is a service that is well-received.

187 Therefore, based on Kano model, patient satisfaction and extension service quality, all the  
188 relationship must be considered. This model is an effective way to explain factors affecting patient  
189 satisfaction and service quality but its limitation is it does not provide actual reason on patient's  
190 response regarding these different factors. There are many theories that explains patient's  
191 satisfaction in health care. Theories provide a framework on people's perception and opinion. The  
192 two well-known theories are the healthcare quality theory (HQT) and the expectancy value theory  
193 (EVT). According to the EVT, a patient's happiness with care is influenced by their beliefs, values,  
194 and prior expectations. The HQT, on the other hand, places a strong emphasis on the importance  
195 of the interpersonal aspects of care in promoting patient satisfaction<sup>13</sup>.

196 Regarding the variables which measured provider's/staff relationship, there was no association,  
197 which concludes the data supports our first theory. The findings reflect respondent's belief and  
198 background, such as respondents with greater levels of education (secondary or higher) reported

199 feeling overall happier than respondents without any formal education. The EVT is used to support  
200 our argument that a greater education raises health literacy. When these patients attend the hospital,  
201 they have more reasonable expectations because they are better able to gather, interpret, and  
202 comprehend fundamental health information. Additionally, those with lower education levels  
203 tended to be poorer among our sample's participants. In reality, 77% of those polled who said they  
204 couldn't make it for more than six months on their principal source of income never attended  
205 school.

206 To determine the characteristics of health literacy and to evaluate its effects on patient satisfaction,  
207 preventative services, healthcare utilization, and costs, Stephanie Macleod looked at two  
208 populations, "sicker" and "healthier."<sup>14</sup> They came to the conclusion that these characteristics  
209 were negatively connected with poor health literacy, which is more prevalent in older and less  
210 educated people. Although health literacy was not a direct outcome of our study, it is conceivable  
211 that it can contribute to an understanding of the patterns in the data.

212 It is also conceivable that deeply ingrained cultural customs may have an impact on patient  
213 satisfaction. The conventional view of disease is that it is an outside force acting as a punishment  
214 or an external force that can only be stopped by an all-powerful force. Expectations of  
215 contemporary medicine and healthcare professionals in general are shaped by these notions.  
216 Understanding the patient population that the hospital serves is vital, especially for any  
217 misconceptions or unreasonable expectations, as a mismatch between patient expectations and the  
218 treatment obtained is linked to decreased satisfaction<sup>15,16</sup>. A study that's explores the role of trust  
219 in patient satisfaction, states positive association between patient satisfaction and higher level of  
220 trust<sup>17</sup>.

221 In our sample population, 91% of those who identified as 'DSFD', 'FR', or 'HDSFD' overall  
222 belonged to the lowest socioeconomic class (as determined by survey criteria). Which, as was  
223 already said, may point to a lack of health literacy and possibly distorted expectations of traditional  
224 versus modern medicine. Although not every member of this group gave the same answers, it is  
225 important to note that there may be an expectation mismatch and/or a lack of trust among them.  
226 But in order to answer this, further research on these people and a comparison would be necessary.  
227 Future research on this association is important because it may shed light on the psychology of  
228 satisfaction in rural and low socioeconomic people.

## 229 **Limitation**

230 Male patients responded to the survey more frequently than female patients (2:1) in our sample  
231 set. because we did not account for this gap in our data analysis, the satisfaction scores primarily  
232 reflect the views of men. We do not view this as a significant constraint because there was no  
233 statistical difference between the sexes. To determine the reason for this disparity and whether  
234 survey weighting would be acceptable for further studies, it is however worthwhile to review our  
235 approach used in the data collection process.

## 236 **Conclusion**

237 According to our research, a sizable majority of patients are satisfied or extremely satisfied. All  
238 categories (staff conduct, services, and facilities) reflect this. As a result, it is safe to say that  
239 hospitals offer great perceived quality and performance. There are three theoretical curves that can  
240 be used to indicate patient satisfaction with regard to quality. Managers of hospitals should make  
241 sure that each of these tasks is carried out to its full potential. This entails fulfilling all of the  
242 patient's fundamental requirements, including any performance requirements. The addition of

243 delighters will also have a large effect on patient satisfaction and perceived treatment quality. Our  
244 findings suggest that background, beliefs, and individual experiences may all affect pleasure. As  
245 a result, demographic data like education level and socioeconomic position are significant factors  
246 that need to be taken into account.

## 247 **Acknowledgement**

248 This research study was fully funded by Nepal Health Research Council (NHRC). We would like  
249 to thank the council for supporting us financially, tertiary eye hospital of Madhesh Province for  
250 coordination and all the respondents, who were willing to participate in this study and provide  
251 relevant information.

## 252 **References**

1. Aragon SJ, Gesell SB. A Patient Satisfaction Theory and Its Robustness Across Gender in Emergency Departments: A Multigroup Structural Equation Modeling Investigation. *Am J Med Qual.* 2003
2. Rajeswari. A STUDY TO ASSESS PATIENT' S SATISFACTION WITH QUALITY OF NURSING CARE. 2011;(November).
3. Q SS, Pathak R, Singh M, Ahluwalia SK, Saini S. An Assessment of Patients Satisfaction with Services Obtained from a Tertiary Care Hospital in Rural Haryana. 4(8):1524–37.
4. Nguyen Thi PL, Briançon S, Empereur F, Guillemin F. Factors determining inpatient satisfaction with care. *Soc SciMed.* 2002;
5. Asadi-Lari M, Tamburini M, Gray D. Patients' needs, satisfaction, and health related quality of life: Towards a comprehensive model. *Health Qual Life Outcomes.* 2004; 2:1–

6. Nguyen BQ, Nguyen CT. An Assessment of Outpatient Satisfaction with Hospital Pharmacy Quality and Influential Factors in the Context of the COVID-19 Pandemic. *Healthcare*. 2022;10(10):1945.
7. Cheng SH, Yang MC, Chiang TL. Patient satisfaction with and recommendation of a hospital: Effects of interpersonal and technical aspects of hospital care. *Int J Qual Heal Care*. 2003;
8. Otani K, Kurz RS, Harris LE. Managing primary care using patient satisfaction measures. *J Healthc Manag*. 2005;
9. Tung YC, Chang GM. Patient satisfaction with and recommendation of a primary care provider: Associations of perceived quality and patient education. *Int J Qual Heal Care*. 2009;
10. . James BC. *Curing vs. Caring: The Art of Service Quality*. Institute for Health Care Delivery Research. Intermountain Health Care. Salt Lake City, Utah; 2003
11. Torcson P. Patient Satisfaction: The Hospitalist's Role. *Hospitalist*. 2015;
12. Aelbrecht K, Rimondini M, Bensing J, Moretti F, Willems S, Mazzi M, et al. Quality of doctor–patient communication through the eyes of the patient: variation according to the patient's educational level. *Adv Heal Sci Educ*. 2015;
13. Mukhtar F, Anjum A, Bajwa MA, Shahzad S, Hamid S, Masood Z, Mustafa R. Patient satisfaction; OPD services in a Tertiary Care Hospital of Lahore. *Professional Med J* 2013;20(6): 973-980.
14. MacLeod S, Musich S, Gulyas S, Cheng Y, Tkatch R, Cempellin D, et al. The impact of inadequate health literacy on patient satisfaction, healthcare utilization, and expenditures among older adults. *Geriatr Nurs (Minneap)*. 2017;

15. Baniya R. Richa Baniya: Traditional Healing Practices in Rural Nepal Traditional Healing Practices in Rural Nepal. J Patan Acad Heal Sci. 2014;
16. Sodani PR, Kumar RK, Srivastava J, Sharma L. Measuring patient satisfaction: A case study to improve quality of care at public health facilities. Indian J Community Med. 2010;
17. Shan L, Li Y, Ding D, Wu Q, Liu C, Jiao M, et al. Patient satisfaction with hospital inpatient care: Effects of trust, medical insurance and perceived quality of care. PLoS One. 2016;

1 **Table 1: Socio-demographic Variable**

| Variable                                           | Negative | Positive | Total |
|----------------------------------------------------|----------|----------|-------|
| <b>Sex</b>                                         |          |          |       |
| Male                                               | 37       | 757      | 794   |
| Female                                             | 22       | 374      | 396   |
| <b>Age</b>                                         |          |          |       |
| Under 18                                           | -        | 7        | 7     |
| 19 -29                                             | 2        | 88       | 90    |
| 30-39                                              | 13       | 204      | 217   |
| 40-49                                              | 17       | 366      | 383   |
| 50-59                                              | 9        | 243      | 252   |
| 60-69                                              | 16       | 206      | 222   |
| 70-79                                              | -        | 25       | 25    |
| 80-89                                              | -        | 5        | 5     |
| 90-99                                              | -        | 4        | 4     |
| <b>Patient type</b>                                |          |          |       |
| Out patient                                        | 43       | 901      | 944   |
| inpatient                                          | 16       | 230      | 246   |
| <b>Education level</b>                             |          |          |       |
| Illiterate                                         | 24       | 365      | 388   |
| only read and write                                | 26       | 354      | 380   |
| primary level education                            | 5        | 205      | 210   |
| lower secondary level                              | 3        | 99       | 102   |
| secondary level                                    | 1        | 89       | 90    |
| higher education or more                           | -        | 20       | 20    |
| <b>Length of survival on main source of income</b> |          |          |       |
| Less than 6 months                                 | 54       | 744      | 798   |
| 6-12 months                                        | 4        | 190      | 194   |
| More than 1 year with saving                       | 1        | 197      | 198   |
| <b>Number of visits</b>                            |          |          |       |
| 1 <sup>st</sup> time                               | 31       | 556      | 587   |
| 2 <sup>nd</sup> time                               | 22       | 460      | 482   |
| 3 <sup>rd</sup> time                               | 4        | 71       | 75    |
| 4 <sup>th</sup> or more                            | 2        | 44       | 46    |
| <b>Reason for check-up</b>                         |          |          |       |
| Qualified doctors, nurses, examiners and staff     | 2        | 71       | 73    |

medRxiv preprint doi: <https://doi.org/10.1101/2023.10.18.23297243>; this version posted October 19, 2023. The copyright holder for this preprint (which was not certified by peer review) is the author/funder, who has granted medRxiv a license to display the preprint in perpetuity. It is made available under a [CC-BY 4.0 International license](https://creativecommons.org/licenses/by/4.0/).

|                                                    |    |     |     |
|----------------------------------------------------|----|-----|-----|
| Quality services by modern equipment for low price | 25 | 610 | 635 |
| Attractive hospital building                       | 1  | 13  | 14  |
| Easy access                                        | 31 | 437 | 468 |

2 \*Positive response only includes those who responded "SFD" or "HSFD" to question of overall satisfaction

3 **Table 2: Behaviour of service provider**

| Variable                                                                    | Negative | Positive | Total |
|-----------------------------------------------------------------------------|----------|----------|-------|
| <b>Behavior of the staff at the registration department of the hospital</b> |          |          |       |
| Highly dissatisfied                                                         | -        | 1        | 1     |
| Dissatisfied                                                                | -        | -        | -     |
| Fairly                                                                      | 2        | 21       | 23    |
| Satisfied                                                                   | 33       | 694      | 727   |
| Highly satisfied                                                            | 24       | 415      | 493   |
| <b>Behavior of doctors and examiners</b>                                    |          |          |       |
| Fairly                                                                      | 54       | 744      | 798   |
| Satisfied                                                                   | 4        | 190      | 194   |
| Highly satisfied                                                            | 1        | 197      | 198   |
| <b>Behavior of staff in pharmaceutical and spectacle dispensing unit</b>    |          |          |       |
| Highly dissatisfied                                                         | 31       | 556      | 587   |
| Dissatisfied                                                                | 22       | 460      | 482   |
| Fairly                                                                      | 4        | 71       | 75    |
| Satisfied                                                                   | 2        | 44       | 46    |

medRxiv preprint doi: <https://doi.org/10.1101/2023.10.18.23297243>; this version posted October 19, 2023. The copyright holder for this preprint (which was not certified by peer review) is the author/funder, who has granted medRxiv a license to display the preprint in perpetuity. It is made available under a [CC-BY 4.0 International license](https://creativecommons.org/licenses/by/4.0/).

4 \*Positive response only includes those who responded "SFD" or "HSFD" to question of overall satisfaction

5 **Table 3: Service and Facilitators**

| Variable                              | Negative    | Positive       | Total                         |
|---------------------------------------|-------------|----------------|-------------------------------|
| <b>Opening hours/days of hospital</b> |             |                |                               |
| Highly dissatisfied                   | -           | -              | -                             |
| Dissatisfied                          | 3           | 7              | 10                            |
| Fairly                                | 2           | 63             | 65                            |
| Satisfied                             | 41          | 699            | 740                           |
| Highly satisfied                      | 13          | 362            | 375                           |
| <b>Waiting time</b>                   |             |                |                               |
| 1190 Observations                     | Mean (57.5) | Std Dev (29.2) | Minimum (5)/<br>Maximum (240) |
| <b>Attention given by examiners</b>   |             |                |                               |
| Highly dissatisfied                   | -           | -              | -                             |
| Dissatisfied                          | 1           | 2              | 3                             |



|                                                     |    |     |     |
|-----------------------------------------------------|----|-----|-----|
| Fairly                                              | 2  | 12  | 14  |
| Satisfied                                           | 23 | 508 | 531 |
| Highly satisfied                                    | 33 | 609 | 642 |
| <b>Examination and treatment suggestion</b>         |    |     |     |
| Highly dissatisfied                                 | -  | -   | -   |
| Dissatisfied                                        | 1  | 1   | 2   |
| Fairly                                              | 1  | 29  | 30  |
| Satisfied                                           | 24 | 576 | 600 |
| Highly satisfied                                    | 33 | 525 | 558 |
| <b>Cleanliness of OPD</b>                           |    |     |     |
| Highly dissatisfied                                 | -  | -   | -   |
| Dissatisfied                                        | 1  | 5   | 6   |
| Fairly                                              | 9  | 152 | 161 |
| Satisfied                                           | 42 | 655 | 697 |
| Highly satisfied                                    | 7  | 319 | 326 |
| <b>Pharmaceutical and spectacle dispensing unit</b> |    |     |     |
| Highly dissatisfied                                 | -  | -   | -   |
| Dissatisfied                                        | -  | 2   | 2   |
| Fairly                                              | 15 | 146 | 161 |
| Satisfied                                           | 37 | 658 | 695 |
| Highly satisfied                                    | 7  | 325 | 332 |
| <b>Cost of service</b>                              |    |     |     |
| Highly dissatisfied                                 | -  | -   | -   |
| Dissatisfied                                        | 3  | 3   | 6   |
| Fairly                                              | 4  | 29  | 33  |
| Satisfied                                           | 38 | 767 | 805 |
| Highly satisfied                                    | 14 | 332 | 346 |
| <b>Facilities for visitors</b>                      |    |     |     |
| Highly dissatisfied                                 | -  | -   | -   |
| Dissatisfied                                        | 1  | 5   | 6   |
| Fairly                                              | 1  | 37  | 38  |
| Satisfied                                           | 14 | 153 | 167 |
| Highly satisfied                                    | -  | 37  | 37  |
| <b>Cleanliness of IPD</b>                           |    |     |     |
| Highly dissatisfied                                 | -  | -   | -   |
| Dissatisfied                                        | -  | -   | -   |
| Fairly                                              | 2  | 26  | 28  |
| Satisfied                                           | 14 | 149 | 163 |
| Highly satisfied                                    | 1  | 56  | 57  |
| <b>Behavior of nurses</b>                           |    |     |     |

medRxiv preprint doi: <https://doi.org/10.1101/2023.10.18.23297243>; this version posted October 19, 2023. The copyright holder for this preprint (which was not certified by peer review) is the author/funder, who has granted medRxiv a license to display the preprint in perpetuity. It is made available under a [CC-BY 4.0 International license](https://creativecommons.org/licenses/by/4.0/).

|                                                            |    |       |       |
|------------------------------------------------------------|----|-------|-------|
| Highly dissatisfied                                        | -  | 1     | 1     |
| Dissatisfied                                               | -  | -     | -     |
| Fairly                                                     | 6  | 29    | 35    |
| Satisfied                                                  | 10 | 153   | 163   |
| Highly satisfied                                           | -  | 49    | 49    |
| <b>Performance of physicians<br/>who conducted surgery</b> |    |       |       |
| Highly dissatisfied                                        | 2  | -     | 2     |
| Dissatisfied                                               | 7  | 28    | 35    |
| Fairly                                                     | 1  | 32    | 33    |
| Satisfied                                                  | 5  | 86    | 92    |
| Highly satisfied                                           | 1  | 85    | 86    |
| <b>Would you recommend this<br/>hospital to others?</b>    |    |       |       |
| yes                                                        | 58 | 1,131 | 1,189 |
| no                                                         | 1  | -     | 1     |

medRxiv preprint doi: <https://doi.org/10.1101/2023.10.18.23297243>; this version posted October 19, 2023. The copyright holder for this preprint (which was not certified by peer review) is the author/funder, who has granted medRxiv a license to display the preprint in perpetuity. It is made available under a [CC-BY 4.0 International license](https://creativecommons.org/licenses/by/4.0/).

6 \*Positive response only includes those who responded “SFD” or “HSFD” to question of overall satisfaction
